# Supplementary material for: Malnutrition, Depression, Poor Sleep Quality, and Difficulty Falling Asleep at Night Are Associated with a Higher Risk of Cognitive Frailty in Older Adults during the COVID-19 Restrictions
Source: MDPI journal article supplement (doi:10.3390/nu15132849), 2023-06-23
Supplement: s1 [file s1]

**Supplementary Table S1.** Descriptions of physical frailty parameters and cognitive components in cognitively frail and non-cognitively frail groups.

| Parameters/Components         |                           | <i>n</i> (%), 95%CI         |                                                                             | <i>P</i> -value             |            |
|-------------------------------|---------------------------|-----------------------------|-----------------------------------------------------------------------------|-----------------------------|------------|
|                               |                           | Total<br>( <i>n</i> = 408)  | Cognitive frailty status<br>CF ( <i>n</i> = 164)      NCF ( <i>n</i> = 244) |                             |            |
| Physical frailty              | Self-reported exhaustion  | 170 (41.7),<br>37.0 to 46.0 | 113 (68.9),<br>62.0 to 76.0                                                 | 57 (23.4),<br>18.0 to 29.0  | < 0.001**  |
|                               | Unintended weight loss    | 122 (29.9),<br>25.4 to 34.4 | 86 (52.4),<br>44.7 to 60.1                                                  | 36 (14.8),<br>10.3 to 19.4  | < 0.001**  |
|                               | Weakness                  | 253 (62.0),<br>57.3 to 66.7 | 140 (85.4),<br>79.9 to 90.8                                                 | 113 (46.3),<br>40.0 to 52.6 | < 0.001**  |
|                               | Slow walking speed        | 268 (65.7),<br>61.1 to 70.3 | 148 (90.2),<br>85.6 to 94.98                                                | 120 (49.2),<br>42.9 to 55.5 | < 0.001**  |
|                               | Low physical activity     | 84 (20.6),<br>16.6 to 24.5  | 60 (36.6),<br>29.1 to 44.0                                                  | 24 (9.8),<br>6.1 to 13.6    | < 0.001**  |
| Physical frailty              |                           |                             |                                                                             |                             |            |
| Non-frail                     |                           | (58.6), 53.8 to 63.4        |                                                                             |                             |            |
| Pre-frail/frail               |                           | (41.4), 36.6 to 46.22       |                                                                             |                             |            |
| Cognitive function impairment | Executive function        | 363 (89.0),<br>85.9 to 92.0 | 159 (97.0),<br>94.3 to 99.6                                                 | 204 (83.6),<br>78.9 to 88.3 | < 0.001 ** |
|                               | Fluency                   | 76 (18.6),<br>14.8 to 22.4  | 39 (23.8),<br>17.2 to 30.4                                                  | 37 (15.2),<br>10.6 to 19.7  | < 0.001**  |
|                               | Orientation               | 22 (5.4),<br>3.2 to 7.6     | 5 (3.0),<br>0.4 to 5.7                                                      | 17 (7.0),<br>3.8 to 10.2    | 0.039*     |
|                               | Calculation               | 25 (6.1),<br>3.8 to 8.5     | 15 (9.1),<br>4.7 to 13.6                                                    | 10 (4.1),<br>1.6 to 6.6     | 0.004*     |
|                               | Abstraction               | 86 (21.1),<br>17.1 to 25.1  | 49 (29.9),<br>22.8 to 37.0                                                  | 37 (15.2),<br>10.6 to 19.7  | < 0.001**  |
|                               | Delayed recall            | 147 (36.0),<br>31.4 to 40.7 | 69 (42.1),<br>34.4 to 49.7                                                  | 78 (32.0),<br>26.1 to 37.9  | 0.052      |
|                               | Visuoperception           | 76 (18.6),<br>14.8 to 22.1  | 43 (26.2),<br>19.4 to 33.0                                                  | 33 (13.5),<br>9.2 to 17.8   | 0.643      |
|                               | Naming                    | 1 (0.2),<br>0.2 to 0.7      | 0 (0.0)                                                                     | 1 (0.4),<br>0.0 to 1.2      | 0.001**    |
|                               | Attention                 | 140 (34.3),<br>29.7 to 38.9 | 75 (45.7),<br>38.0 to 53.4                                                  | 65 (26.6),<br>21.1 to 32.2  | < 0.001**  |
|                               | Alternative attention     | 147 (36.0),<br>21.3 to 40.7 | 79 (48.2),<br>40.4 to 55.9                                                  | 68 (27.9),<br>22.2 to 33.5  | < 0.001**  |
|                               | Mild cognitive impairment |                             |                                                                             |                             |            |
| No                            |                           | 63 (15.4), 11.9 to 19.0     |                                                                             |                             |            |
| Yes                           |                           | 345 (84.6), 81.0 to 88.1    |                                                                             |                             |            |

Abbreviations: CF, Cognitive frailty; NCF, non-cognitive frailty; CI, confidence interval. \* Significant association at  $p < 0.05$ ; \*\* Significant association at  $p < 0.001$ .

**Supplementary Table S2.** Comparison of nutritional status using MNA-SF screening in cognitively frail and non-cognitively frail groups.

| MNA-SF Questions                                                                                                                 | Total<br>(N= 408) | Cognitive frailty status |                  | P-value            |
|----------------------------------------------------------------------------------------------------------------------------------|-------------------|--------------------------|------------------|--------------------|
|                                                                                                                                  |                   | CF<br>(n = 164)          | NCF<br>(n = 244) |                    |
| Has food intake declined over the past 3 months due to loss of appetite, digestive problems, chewing or swallowing difficulties? |                   |                          |                  |                    |
| Severe decrease in food intake                                                                                                   | 31 (7.6)          | 19 (11.6)                | 12 (4.9)         | < 0.001**, a       |
| Moderate decrease in food intake                                                                                                 | 104 (25.5)        | 62 (37.8)                | 42 (17.2)        |                    |
| No decrease in food intake                                                                                                       | 273 (66.9)        | 83 (50.6)                | 190 (77.9)       |                    |
| Weight loss during the last 3 months                                                                                             |                   |                          |                  |                    |
| Weight loss greater than 3 kg (6.6 lbs)                                                                                          | 31 (7.6)          | 19 (11.6)                | 12 (4.9)         | < 0.001**, a       |
| Does not know                                                                                                                    | 13 (3.2)          | 9 (5.5)                  | 4 (1.6)          |                    |
| Weight loss between 1 and 3 kg (2.2 and 6.6 lbs)                                                                                 | 93 (22.8)         | 49 (29.9)                | 44 (18.0)        |                    |
| No weight loss                                                                                                                   | 271 (66.4)        | 87 (32.1)                | 184 (75.4)       |                    |
| Mobility                                                                                                                         |                   |                          |                  |                    |
| Bed or chair bound                                                                                                               | 1 (0.2)           | 0 (0.0)                  | 1 (0.4)          | 0.161 <sup>b</sup> |
| Able to get out of bed/ chair but does not go out                                                                                | 2 (0.5)           | 2 (1.2)                  | 0 (0.0)          |                    |
| Goes out                                                                                                                         | 405 (99.3)        | 162 (98.8)               | 243 (99.6)       |                    |
| Has suffered psychological stress or acute disease in the past 3 months?                                                         |                   |                          |                  |                    |
| Yes                                                                                                                              | 42 (10.3)         | 25 (15.2)                | 17 (7.0)         | 0.008*, a          |
| No                                                                                                                               | 366 (89.7)        | 139 (84.8)               | 227 (93.0)       |                    |
| Neuropsychological problems                                                                                                      |                   |                          |                  |                    |
| Severe dementia or depression                                                                                                    | 238 (58.3)        | 86 (52.4)                | 152 (62.3)       | 0.083 <sup>b</sup> |
| Mild dementia                                                                                                                    | 162 (39.7)        | 73 (44.5)                | 89 (36.5)        |                    |
| No psychological problems                                                                                                        | 8 (2.0)           | 5 (3.0)                  | 3 (1.2)          |                    |
| Body Mass Index (BMI) (kg/m <sup>2</sup> )                                                                                       |                   |                          |                  |                    |
| Less than 19                                                                                                                     | 48 (11.9)         | 21 (13.3)                | 27 (11.1)        | 0.785 <sup>a</sup> |
| 19 to less than 21                                                                                                               | 79 (19.7)         | 31 (19.6)                | 48 (19.7)        |                    |
| 21 to less than 23                                                                                                               | 88 (21.9)         | 31 (19.6)                | 57 (23.4)        |                    |
| 23 or greater                                                                                                                    | 187 (46.5)        | 75 (47.5)                | 112 (45.9)       |                    |

Abbreviations: CF, Cognitive frailty; NCF, non-cognitive frailty; MNA-SF, Mini Nutritional Assessment (Short form); Statistical analysis was performed by <sup>a</sup> Chi-square test and <sup>b</sup> Fisher's Exact test. \* Significant association at  $p < 0.05$ ; \*\* Significant association at  $p < 0.001$ .

**Supplementary Table S3.** Comparison of the percentage of TGDS-15 questions between cognitively frail and non-cognitively frail groups.

| TGDS-15 Questions                                                             | Response answer <sup>#</sup> | Total (N= 408) | Cognitive frailty status |               | P-value                              |
|-------------------------------------------------------------------------------|------------------------------|----------------|--------------------------|---------------|--------------------------------------|
|                                                                               |                              |                | CF (n = 164)             | NCF (n = 244) |                                      |
| 1. Are you basically satisfied with your life?                                | <b>No</b>                    | 15 (3.7)       | 5 (3.0)                  | 10 (4.1)      | 0.581 <sup>a</sup>                   |
| 2. Have you dropped many of your activities or interests?                     | <b>Yes</b>                   | 112 (27.5)     | 60 (36.6)                | 52 (21.3)     | 0.001 <sup>**</sup> , <sup>a</sup>   |
| 3. Do you feel that your life is empty?                                       | <b>Yes</b>                   | 58 (14.2)      | 37 (22.6)                | 21 (8.6)      | < 0.001 <sup>**</sup> , <sup>a</sup> |
| 4. Do you often feel bored?                                                   | <b>Yes</b>                   | 68 (16.7)      | 48 (29.3)                | 20 (8.2)      | < 0.001 <sup>**</sup> , <sup>a</sup> |
| 5. Are you in good spirits most of the time?                                  | <b>No</b>                    | 12 (2.9)       | 8 (4.9)                  | 4 (1.6)       | 0.074 <sup>b</sup>                   |
| 6. Are you afraid that something bad is going to happen to you?               | <b>Yes</b>                   | 87 (21.3)      | 46 (28.0)                | 41 (16.8)     | 0.007 <sup>*</sup> , <sup>a</sup>    |
| 7. Do you feel happy most of the time?                                        | <b>No</b>                    | 9 (2.2)        | 5 (3.0)                  | 4 (1.6)       | 0.494 <sup>b</sup>                   |
| 8. Do you often feel helpless?                                                | <b>Yes</b>                   | 31 (7.6)       | 21 (12.8)                | 10 (4.1)      | 0.001 <sup>**</sup> , <sup>a</sup>   |
| 9. Do you prefer to stay at home, rather than going out and doing new things? | <b>Yes</b>                   | 265 (65.0)     | 111 (67.7)               | 154 (63.1)    | 0.343 <sup>a</sup>                   |
| 10. Do you feel you have more problems with your memory than most?            | <b>Yes</b>                   | 122 (29.9)     | 62 (37.8)                | 60 (24.6)     | 0.004 <sup>*</sup> , <sup>a</sup>    |
| 11. Do you think it is wonderful to be alive?                                 | <b>No</b>                    | 33 (8.1)       | 21 (12.8)                | 12 (4.9)      | 0.004 <sup>**</sup> , <sup>a</sup>   |
| 12. Do you feel pretty worthless the way you are now?                         | <b>Yes</b>                   | 17 (4.2)       | 13 (7.9)                 | 4 (1.6)       | 0.002 <sup>*</sup> , <sup>a</sup>    |
| 13. Do you feel full of energy?                                               | <b>No</b>                    | 46 (11.3)      | 25 (15.2)                | 21 (8.6)      | 0.038 <sup>*</sup> , <sup>a</sup>    |
| 14. Do you feel that your situation is hopeless?                              | <b>Yes</b>                   | 25 (6.1)       | 19 (11.6)                | 6 (1.5)       | < 0.001 <sup>**</sup> , <sup>a</sup> |
| 15. Do you think that most people are better off than you are?                | <b>Yes</b>                   | 52 (12.7)      | 34 (20.7)                | 18 (7.4)      | < 0.001 <sup>**</sup> , <sup>a</sup> |

<sup>#</sup> problems (response answers in bold) indicate depression; Statistical analysis was performed by <sup>a</sup> Chi-square test and

<sup>b</sup> Fisher's Exact test; Abbreviations: CF, Cognitive frailty; NCF, non-cognitive frailty; TGDS, Thai Geriatric Depression Scores. \* Significant association at  $p < 0.05$ ; \*\* Significant association at  $p < 0.001$ .

**Supplementary Table S4.** Descriptives of PSQI components in cognitively frail and non-cognitively frail groups.

| PSQI components, n (%)                     | Total<br>(n = 408) | Cognitive frailty |                  | P-value               |
|--------------------------------------------|--------------------|-------------------|------------------|-----------------------|
|                                            |                    | CF<br>(n = 164)   | NCF<br>(n = 244) |                       |
| 1. Subjective sleep quality                |                    |                   |                  |                       |
| Very good (0 score)                        | 336 (82.4)         | 126 (76.8)        | 210 (86.1)       | 0.043 <sup>*, a</sup> |
| Fairly good (1 score)                      | 50 (12.3)          | 24 (14.6)         | 26 (10.7)        |                       |
| Fairly bad (2 scores)                      | 18 (4.4)           | 12 (7.3)          | 6 (2.5)          |                       |
| Very bad (3 scores)                        | 4 (1.0)            | 2 (1.2)           | 2 (0.8)          |                       |
| 2. Sleep latency                           |                    |                   |                  |                       |
| 0 (score)                                  | 188 (46.1)         | 65 (39.6)         | 123 (50.4)       | 0.042 <sup>*, b</sup> |
| 1 – 2 (1 score)                            | 114 (27.9)         | 46 (28.0)         | 68 (27.9)        |                       |
| 3 – 4 (2 scores)                           | 64 (15.7)          | 29 (17.7)         | 35 (14.3)        |                       |
| 5 – 6 (scores)                             | 42 (10.3)          | 24 (14.6)         | 18 (7.4)         |                       |
| 3. Sleep duration                          |                    |                   |                  |                       |
| > 7 (0 score)                              | 266 (65.2)         | 107 (65.2)        | 159 (65.2)       | 0.177 <sup>b</sup>    |
| 6 – 7 (1 score)                            | 59 (14.5)          | 25 (15.2)         | 34 (13.9)        |                       |
| 5 – 6 (2 scores)                           | 67 (16.4)          | 22 (13.4)         | 45 (18.4)        |                       |
| < 5 (3 scores)                             | 16 (3.9)           | 10 (6.1)          | 6 (2.5)          |                       |
| 4. Sleep efficiency (%)                    |                    |                   |                  |                       |
| > 85 (0 score)                             | 335 (82.1)         | 128 (78.0)        | 207 (84.8)       | 0.058 <sup>b</sup>    |
| 75 – 84 (1 score)                          | 26 (6.4)           | 11 (6.7)          | 15 (6.1)         |                       |
| 65 – 74 (2 scores)                         | 19 (4.7)           | 7 (4.3)           | 12 (4.9)         |                       |
| < 65 (3 scores)                            | 28 (6.9)           | 18 (11.0)         | 10 (4.1)         |                       |
| 5. Sleep disturbance (scores)              |                    |                   |                  |                       |
| 0 (0 score)                                | 12 (2.9)           | 7 (4.3)           | 5 (2.0)          | 0.202 <sup>a</sup>    |
| 1 – 9 (1 score)                            | 300 (73.5)         | 112 (68.3)        | 188 (77.0)       |                       |
| 10 – 18 (2 scores)                         | 90 (22.1)          | 42 (25.6)         | 48 (19.7)        |                       |
| 19 – 27 (3 scores)                         | 6 (1.5)            | 3 (1.8)           | 3 (1.2)          |                       |
| 6. Use of sleep medication                 |                    |                   |                  |                       |
| Not during past month (0 score)            | 17 (4.2)           | 7 (4.3)           | 10 (4.1)         | 0.637 <sup>b</sup>    |
| Less than once a week (1 score)            | 18 (4.4)           | 8 (4.9)           | 10 (4.1)         |                       |
| Once or twice a week (2 scores)            | 119 (29.2)         | 53 (32.3)         | 66 (27.0)        |                       |
| Three or more than times a week (3 scores) | 254 (62.3)         | 96 (23.5)         | 158 (64.8)       |                       |
| 7. Daytime dysfunction (scores)            |                    |                   |                  |                       |
| 0 (0 score)                                | 286 (70.1)         | 102 (62.2)        | 184 (75.4)       | 0.024 <sup>*, a</sup> |
| 1 – 2 (1 score)                            | 99 (24.3)          | 49 (29.9)         | 50 (20.5)        |                       |
| 3 – 4 (2 scores)                           | 19 (4.7)           | 11 (6.7)          | 8 (3.3)          |                       |
| 5 – 6 (3 scores)                           | 4 (1.0)            | 2 (1.2)           | 2 (0.8)          |                       |

Abbreviations: CF, Cognitive frailty; NCF, non-cognitive frailty; PSQI, Pittsburgh Sleep Quality Index; Statistical analysis was performed by <sup>a</sup> Fisher's Exact test and <sup>b</sup> Chi-square test. \* Significant association at  $p < 0.05$ .

**Supplementary Table S5.** Comparison of sleeping quality scores and its components in cognitively frail and non-cognitively frail groups.

| Sleep Quality                     | Mean SD, median [IQR] |                          |           | P-value |
|-----------------------------------|-----------------------|--------------------------|-----------|---------|
|                                   | Total<br>(n = 408)    | Cognitive frailty status |           |         |
|                                   |                       | CF                       | NCF       |         |
|                                   |                       | (n = 164)                | (n = 244) |         |
| Subjective sleep quality (scores) | 0.0 [0.0]             | 0.0 [0.0]                | 0.0 [0.0] | 0.013 * |
| Sleep latency (scores)            | 1.0 [2.0]             | 1.0 [2.0]                | 0.0 [1.0] | 0.008 * |
| Sleep duration (scores)           | 0.0 [1.0]             | 0.0 [1.0]                | 0.0 [0.0] | 0.960   |
| Sleep efficiency (scores)         | 0.0 [0.0]             | 0.0 [0.0]                | 0.0 [0.0] | 0.055 * |
| Sleep disturbance (scores)        | 1.0 [0.0]             | 1.0 [1.0]                | 1.0 [0.0] | 0.296   |
| Use of sleep medication (scores)  | 3.0 [1.0]             | 3.0 [1.0]                | 3.0 [1.0] | 0.229   |
| Daytime dysfunction (scores)      | 0.0 [1.0]             | 0.0 [1.0]                | 0.0 [0.0] | 0.004 * |

Abbreviations: CF, Cognitive frailty; NCF, non-cognitive frailty; SD, Standard deviation; IQR, Interquartile range; Statistical analysis was performed by the Mann-Whitney U test. \* Significant association at  $p < 0.05$ .
